# Supplementary material for: Profiling the tyrosine phosphoproteome of different mouse mammary tumour models reveals distinct, model-specific signalling networks and conserved oncogenic pathways
Source: Springer Nature journal article supplement (doi:10.1186/s13058-014-0437-3), 2014-09-08

**A**

| Tumor type/ original clone        | Xenograft - Tumor number |
|-----------------------------------|--------------------------|
| <u><i>tp53</i></u> <sup>-/-</sup> |                          |
| 117                               | 1204,1203                |
| 116                               | 1202,1201,3049           |
| 113                               | 1206,1205                |
| 5101 (BI6)                        | 14845                    |
| <u>Her2/Neu</u>                   |                          |
| 436                               | 1200,3050,3057           |
| 438                               | 3051,1197                |
| <u>PyMT</u>                       |                          |
| 10 No.2                           | 3075                     |
| 20 No.1                           | 3076, 3077               |
| 271                               | 3096,1186                |
| 20 No.2                           | 3095                     |
| 263                               | 1185                     |
| 264                               | 1187                     |

**B**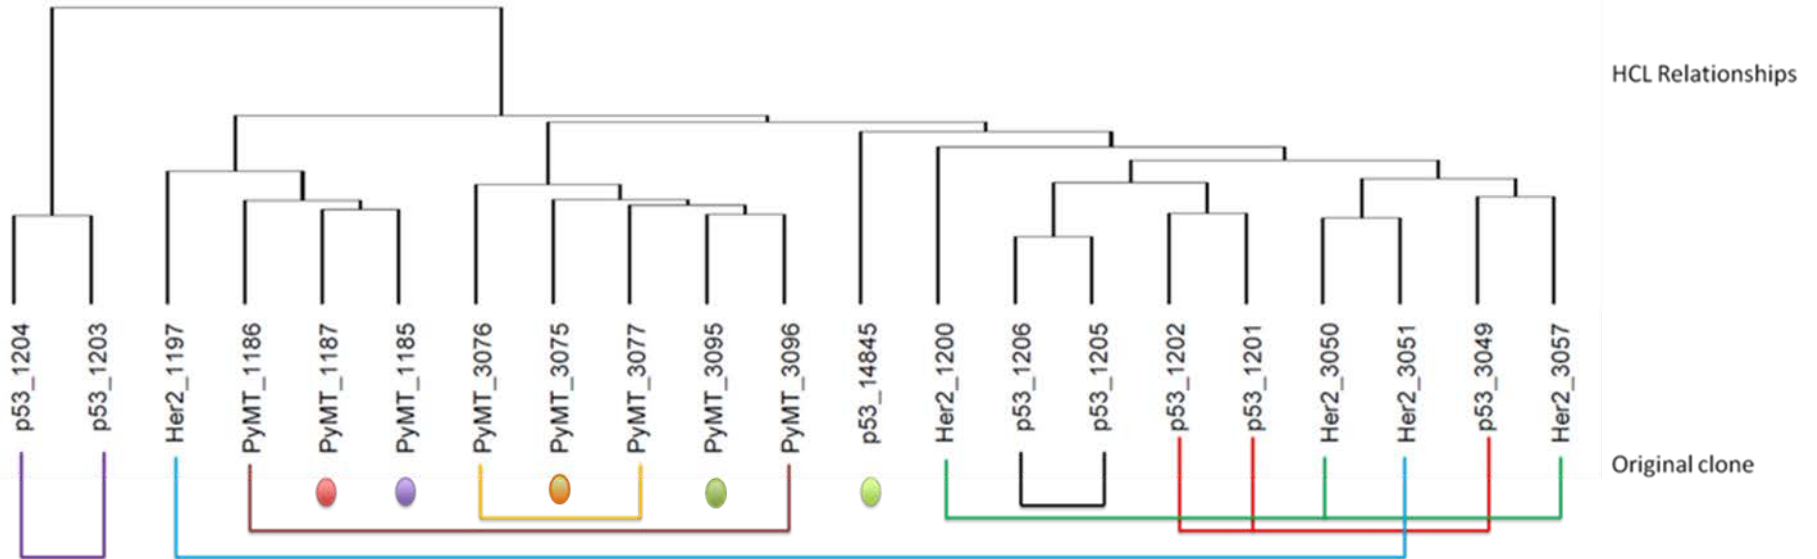

Supplement: MOESM1 [file 9781166]
