# Supplementary material for: Profiling the tyrosine phosphoproteome of different mouse mammary tumour models reveals distinct, model-specific signalling networks and conserved oncogenic pathways
Source: Springer Nature journal article supplement (doi:10.1186/s13058-014-0437-3), 2014-09-08

**A**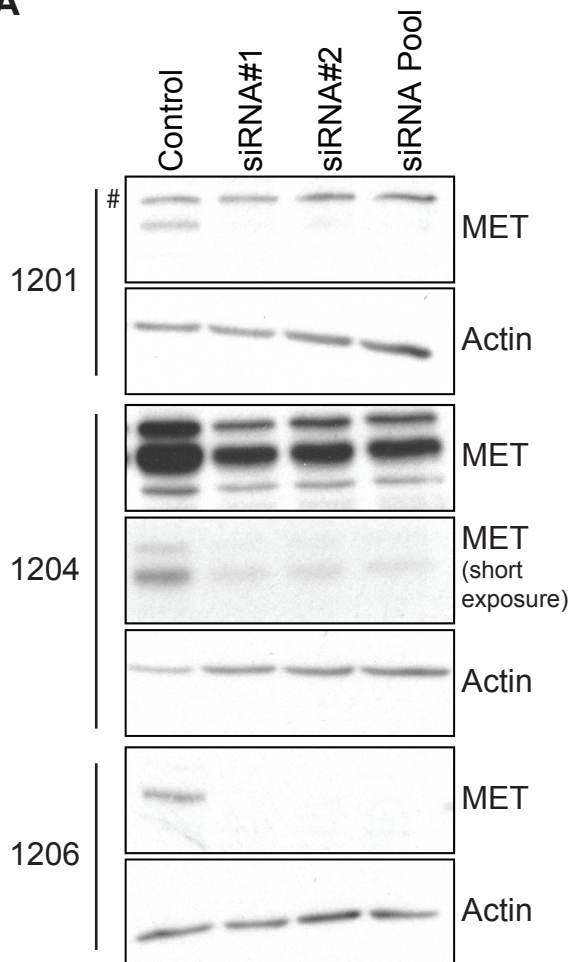**B**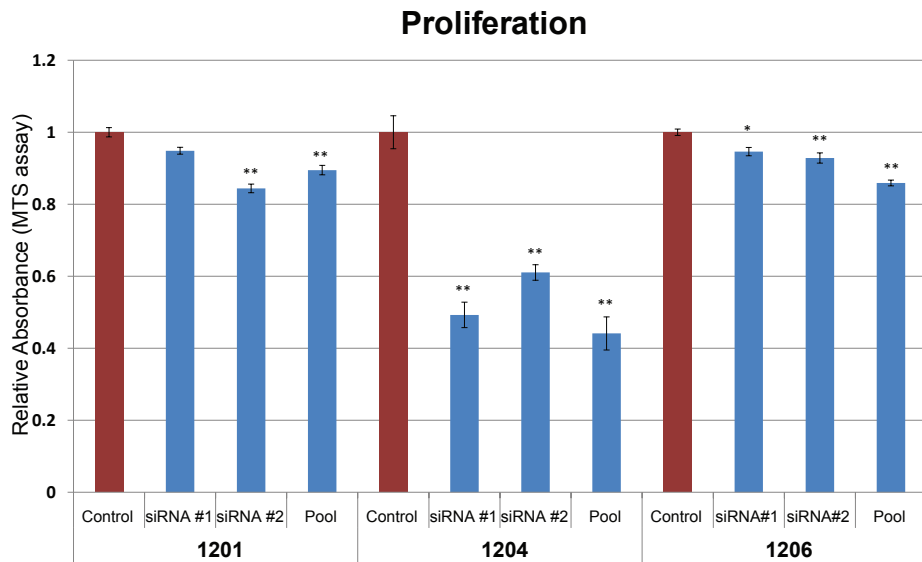

Supplement: MOESM12 [file 9781166]
